# Supplementary material
Source: publisher figshare collection journal article supplement (https://acs.figshare.com/ndownloader/files/4084294)
Supplement: Supplementary file 1 [file 4084294]

**$\alpha$ -Glucosidase Inhibitors via Green Pathway: Biotransformation for  
Bicoumarins Catalyzed by *Momordica Charantia Peroxidase***

Xiao-Jun Hu, Xiao-Bing Wang and Ling-Yi Kong \*

State Key Laboratory of Natural Medicines, Department of Natural Medicinal  
Chemistry, China Pharmaceutical University  
24 Tong Jia Xiang, Nanjing 210009, People's Republic of China

\*Corresponding author:

Prof. Ling-Yi Kong.

Tel/Fax: +86-25-83271405.

E-mail: [cpu\\_lykong@126.com](mailto:cpu_lykong@126.com)

## Supporting Information

HPLC analysis was achieved on an Agilent Zorbax SB-C18 column (4.6 mm × 250 mm, 5 µm) at 30 °C, eluting with a gradient (20 minutes) of increasing MeOH (40%–100%) in water. The effluent was monitored by the DAD detector at 330 nm and the flow rate was kept at 1.0 mL/min constantly.

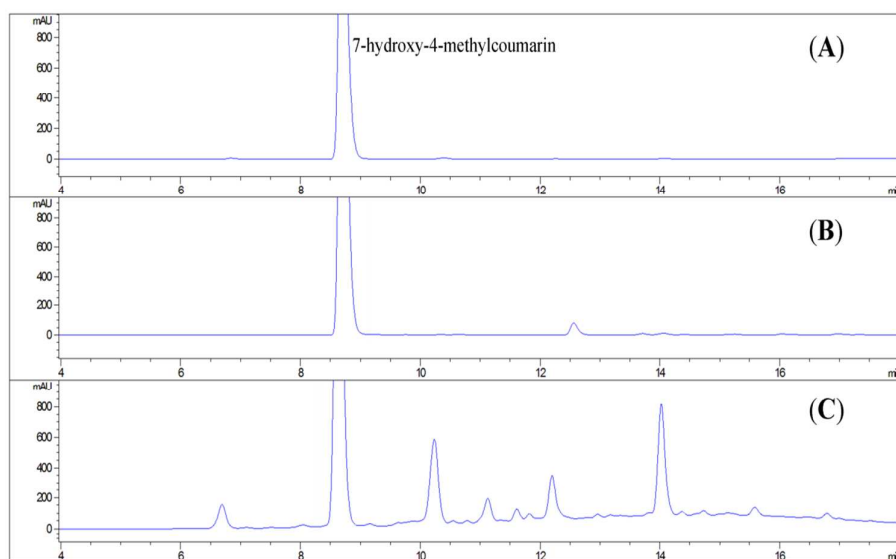

**Figure S1.** HPLC chromatogram monitored at 330 nm of incubations of 7-hydroxy-4-methylcoumarin under different reaction conditions: (A) incubations of 7-hydroxy-4-methylcoumarin only with MCP; (B) incubations of 7-hydroxy-4-methylcoumarin only with H<sub>2</sub>O<sub>2</sub>; (C) incubations of 7-hydroxy-4-methylcoumarin with MCP and H<sub>2</sub>O<sub>2</sub>.
